# Supplementary material for: The utilization of a three-dimensional reduced graphene oxide and montmorillonite composite aerogel as a multifunctional agent for wastewater treatment
Source: Royal Society of Chemistry journal article supplement (doi:10.1039/c7ra13103h), 2018-01-01
Supplement: c7ra13103h1.pdf [file c7ra13103h1.pdf]

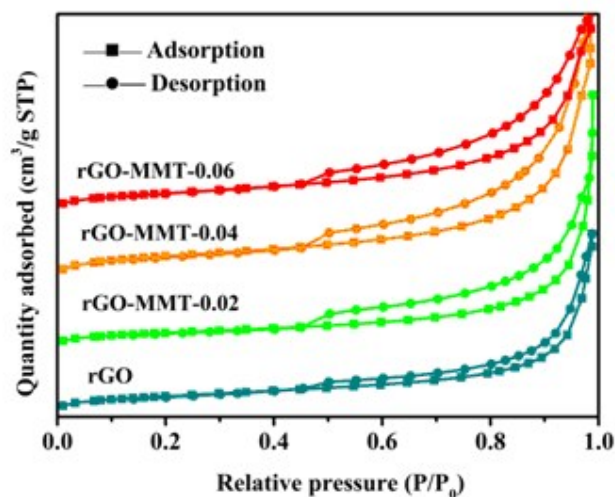

**Fig. S1** Nitrogen adsorption-desorption isotherms (measured at 77 K) of rGO, rGO-MMT-0.02, rGO-MMT-0.04 and rGO-MMT-0.06.

**Table S1** The nitrogen adsorption-desorption results for rGO, rGO-MMT-0.02, rGO-MMT-0.04 and rGO-MMT-0.06.

| Sample       | BSA <sup>a</sup><br>(m <sup>2</sup> /g) | PMA <sup>b</sup><br>(m <sup>2</sup> /g) | PEA <sup>c</sup><br>(m <sup>2</sup> /g) | PV <sup>d</sup><br>(cm <sup>3</sup> /g) | APD <sup>e</sup><br>(nm) |
|--------------|-----------------------------------------|-----------------------------------------|-----------------------------------------|-----------------------------------------|--------------------------|
| rGO          | 33.51                                   | 1.49                                    | 32.02                                   | 0.082                                   | 97.78                    |
| rGO-MMT-0.02 | 27.69                                   | 0.98                                    | 26.71                                   | 0.085                                   | 119.83                   |
| rGO-MMT-0.04 | 43.17                                   | 0.83                                    | 42.33                                   | 0.13                                    | 123.28                   |
| rGO-MMT-0.06 | 36.24                                   | 0.42                                    | 35.82                                   | 0.11                                    | 125.24                   |

- BSA was BET surface area.
- PMA was t-plot micropore area.
- PEA was t-plot external surface area.
- PV was pore volume.
- APD was average adsorption pore.

The N<sub>2</sub> adsorption-desorption isotherms of rGO, rGO-MMT-0.02, rGO-MMT-0.04 and rGO-MMT-0.06 aerogels (Fig. S1) exhibited type IV isotherms, according to the IUPAC classification.<sup>33</sup> The increase of the nitrogen adsorption at a high relative pressure of above 0.9 was associated with the macro pore or intergranular void. According to (Table S1), The BET surface areas of rGO, rGO-MMT-0.02, rGO-MMT-0.04 and rGO-MMT-0.06 aerogels were 33.51, 27.69, 43.17 and 36.24 m<sup>2</sup>/g, respectively. Moreover, the average pore diameters were calculated to be 97.78, 119.83, 123.28 and 125.25 nm, suggesting again the formation of macro pore or intergranular void. In particular, rGO-MMT-0.04 had a relatively large surface area with a relatively high pore volume and loose structure compared to rGO. In other words, the application of 0.04 wt.% MMT was beneficial for the dispersion of rGO and the enhanced adsorption capability.

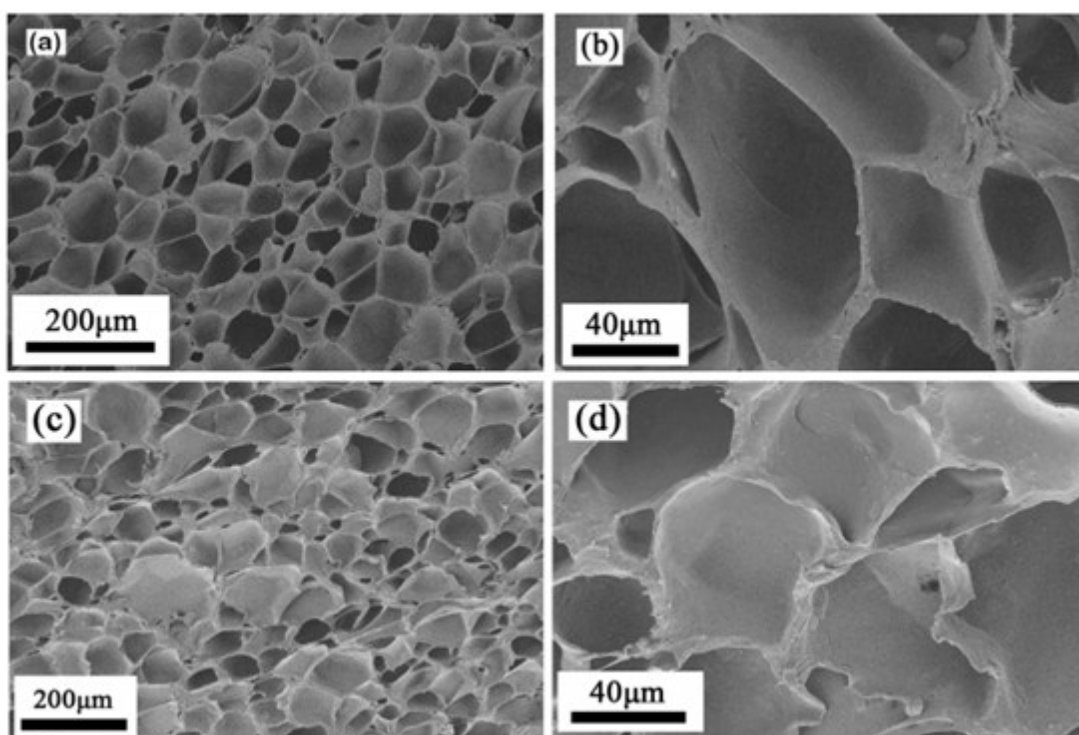

**Fig. S2** SEM images of rGO-MMT-0.04 aerogel (a, b) and rGO-MMT-0.06 aerogel (c, d).

According to the Fig. S2, the pore volume of rGO-MMT-0.04 sample larger than the pore volume of the rGO-MMT-0.06 sample. In a word, the application of 0.04 wt.% MMT was beneficial for the dispersion of rGO and the enhanced adsorption capability. Thus, rGO-MMT-0.04 was selected in subsequent experiments.

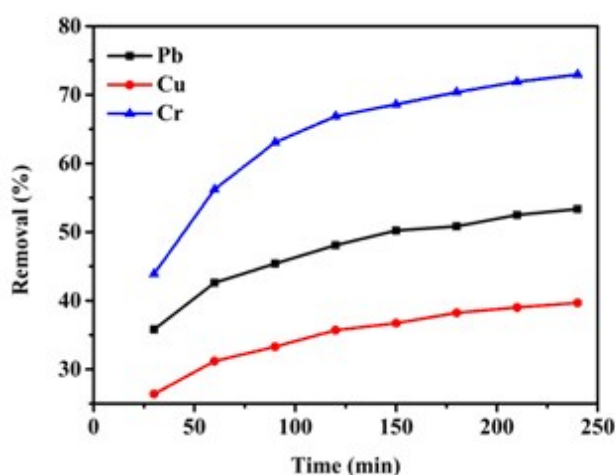

**Fig. S3** Adsorption of Cr (VI), Cu (II) and Pb (II) on rGO-MMT at pH=6 and room temperature (concentrations of Cr (VI), Cu (II) and Pb (II) ions were 20 mg/L, 10 mg/L and 10 mg/L).

To evaluate the multiple adsorption of rGO-MMT for heavy metal ions, 10 mg/L  $\text{Cu}(\text{NO}_3)_2$ , 10 mg/L  $\text{Pb}(\text{NO}_3)_2$  and 20 mg/L  $\text{K}_2\text{Cr}_2\text{O}_7$  were mixed together in the solution. As shown in Fig. S3, it was evident that rGO-MMT could not only adsorb Cr (VI), but also adsorb Cu (II) and Pb (II).
